1 **Title**

2 The amount range of membrane cholesterol required for robust cell adhesion and proliferation in  
3 serum-free condition.

4

5 Shino Takii<sup>1</sup>, Jun Wu<sup>2, 3</sup>, Daiji Okamura<sup>1\*</sup>

6

7 <sup>1</sup>Department of Advanced Bioscience, Graduate School of Agriculture, Kindai University, 3327-204  
8 Nakamachi, Nara 631-8505, Japan

9 <sup>2</sup>Department of Molecular Biology, University of Texas Southwestern Medical Center, Dallas, TX  
10 75390, USA

11 <sup>3</sup>Hamon Center for Regenerative Science and Medicine, University of Texas Southwestern Medical  
12 Center, Dallas, TX 75390, USA

13

14 \*Corresponding author:

15 E-mail: [dokamura@nara.kindai.ac.jp](mailto:dokamura@nara.kindai.ac.jp)

16 Telephone: +81-742-43-5384

17 Fax: +81-742-43-8976

18 **Abstract:**

19 Serum-containing medium is widely used to support cell attachment, stable growth and serial  
20 passaging of various cancer cell lines. However, the presence of cholesterol and lipids in serum  
21 greatly hinders the analysis of the effects of cholesterol depletion on cells in culture. In this study, we  
22 develop a defined serum-free culture condition accessible to a variety of different types of adherent  
23 cancer cells. We tested different factors that are considered essential for cell culture and various  
24 extracellular matrix for plate coating, and found cells cultured in Dulbecco's Modified Eagle's Medium  
25 (DMEM) basal media supplemented with Albumin (BSA) and insulin-transferrin-selenium-  
26 ethanolamine (ITS-X) on fibronectin-precoated well (called as “DA-X condition”) showed comparable  
27 proliferation and survival to those in a serum-containing medium. Interestingly, we observed that DA-  
28 X condition could be adapted to a wide variety of adherent cancer cell lines, which enabled the analysis  
29 of how cholesterol depletion affected cancer cells in culture. Mechanistically, we found the beneficial  
30 effects of the DA-X condition in part can be attributed to the appropriate level of membrane cholesterol,  
31 and fibronectin-mediated signaling plays an important role in the suppression of cholesterol production.

32

33 **Keywords:**

34 Cholesterol, Serum-free medium, Membrane, Cell adhesion, Proliferation, Pseudopodia

35

36 **Introduction:**

37 Modern advances in medical and biological sciences have largely relied on the development of cell  
38 culture technology(1). The ability and quality of culture medium to support cell survival, proliferation,  
39 and function in vitro have a direct impact on research outcomes. Thus, it is essential to select the  
40 appropriate medium when conducting cell culture experiments. It is well-established that serum-  
41 containing medium provides an optimal culture condition, which is widely used to support attachment,  
42 stable growth and serial passaging of various cancer cell lines in culture. However, as cell culture  
43 research progressed, the need for serum-free culture media, which are expected to help overcome  
44 various ethical and scientific issues, became apparent(2). Compared to serum-containing media,  
45 serum-free media have advantages such as less variability between lots, more consistent, and in many  
46 cases lower cost (unless expensive growth factors and cytokines are used)(3).

47 Cholesterol, an essential component of mammalian cell membranes, not only maintains cell  
48 structure, but also plays an important role in other cellular functions such as biosynthesis of bile acids  
49 and hormones, embryonic development, and cell proliferation(4). Most of the cellular cholesterol  
50 enriches in the plasma membrane after transportation from endoplasmic reticulum, which regulates  
51 cellular proliferation, differentiation, and survival. Cholesterol metabolism is known to critically

52 contributes to cancer cell proliferation, migration and invasion, and accumulation of cholesterol in  
53 solid tumors is considered as the hallmark for aggressive cancers(5–9). However, given that serum  
54 contains numerous cholesterols and lipids, serum-containing media are therefore not ideal for studying  
55 effects of cholesterols on cancer cells in culture. Although serum-free media with optimized  
56 compositions for each adherent cancer cell line are available, few of these cultures can support the  
57 growth of other cancer cell types, and there is a lack of universal serum-free medium applicable to a  
58 wide range of adherent cell lines. In contrast, in the field of pluripotent stem cells, the use of serum-  
59 free and/or xeno-free medium has become standard(10).

60 In this study, we aimed to develop a universal serum-free culture medium broadly applicable to any  
61 adherent cancer cell types. While testing various essential culture parameters including extracellular  
62 matrix e, we found that growing cells in Dulbecco's Modified Eagle's Medium (DMEM) basal medium  
63 containing Albumin (BSA) and insulin-transferrin-selenium-ethanolamine (ITS-X) on culture plates  
64 pre-coated with fibronectin (called as “DA-X condition”) showed robust cell proliferation and attached  
65 cells exhibited elongated pseudopodia, which were comparable to cells grown in a serum-containing  
66 medium. DA-X condition also facilitated the study of the effects of cholesterol and lipid on cancer  
67 cells in vitro in a wide variety of adherent cancer cell lines. Importantly, we found that cells grown in  
68 the DA-X condition maintained the right amount of membrane cholesterol important for robust cell

69 attachment, pseudopodia elongation and survival in serum free condition, and fibronectin-mediated  
70 signaling plays important roles in suppressing excess cholesterol production.

71

## 72 **Materials and Methods:**

### 73 **Cell lines and culture**

74 Cell lines using in this research were obtained from the Cell Resource Center for Biomedical Research  
75 (Institute of Development, Aging and Cancer, Tohoku University, Japan) and maintained in 10% Fetal  
76 Bovine Serum (Gibco, 10270)-contained DMEM medium (nacalai tesque, 08458-45) which is  
77 supplemented with 1x Penicillin-Streptomycin Mixed Solution (nacalai tesque, 26253-84), and  
78 passaged using TrypLE (Gibco, 12604013) every 4-5 days. Briefly for in RPMI-G,  $2 \times 10^4$  cells were  
79 seeded into one well of a 4-well plate without pre-coating in RPMI1640 medium (nacalai tesque,  
80 3026485) supplemented with 1x ITS-G: Insulin-Transferrin-Selenium (Gibco, 41400045), 1x L-  
81 Glutamine (nacalai tesque, 16948-04), 1x Penicillin-Streptomycin Mixed Solution. In DA-X condition  
82 (shown as ITS-X/ DMEM/ BSA (FN) in Fig. 1a),  $2 \times 10^4$  cells were seeded into one well of a 4-well  
83 plate pre-coated with Fibronectin in DMEM medium (High Glucose) (nacalai tesque, 08458-45)  
84 supplemented with 1x ITS-X: Insulin-Transferrin-Selenium-Ethanolamine (Gibco, 51500056), 5  
85 mg/mL BSA: Bovine Serum Albumin (Sigma, A3059), 1x L-Glutamine, 1x Penicillin-Streptomycin

86 Mixed Solution. DMEM/Ham's F-12 (nacalai tesque, 11581-15) was used for ITS-X/ DMEM/F-12/  
87 BSA (FN) (shown in Fig. 1b). Extracellular matrix was coated on a well of 4-well cell culture plate  
88 (SPL, 30004) and incubated for 1 hour at 37°C at the desired concentration, 1.25 µg/cm<sup>2</sup> for  
89 Fibronectin (FUJIFILM, 063-05591), 1.25 µg/cm<sup>2</sup> for Vitronectin (FUJIFILM, 220-02041), 0.5  
90 µg/cm<sup>2</sup> for Laminin511-E8 fragments: iMatrix-511 (MAX, 892011), 2% for Matrigel (Corning,  
91 354234), 0.2% for Gelatin (Sigma, G1890). For optimization of serum-free culture condition for stable  
92 adhesion, the combination of basal medium, supplements and extracellular matrix shown in the  
93 notation in Fig. 1a at a concentration mentioned above were attempted. For inhibition of fibronectin-  
94 binding and -mediated signaling, RGDS peptide (Cayman, 15359-5) as fibronectin Inhibitor was added  
95 in culture at 50 µg/mL (the solvent, DMSO, was added for control). The images of cells were collected  
96 by a microscopy in phase-contrast (Keyence, BZ-X710).

97

## 98 **Modulation of cholesterol**

99 For modulating of membrane cholesterol contents in culture, Methyl-β-cyclodextrin (MβCD) (Sigma,  
100 332615) for depletion of membrane cholesterol and soluble cholesterol (Sigma, C8667) (complex of  
101 MβCD and cholesterol) were added according to each purpose at 0.2 mM, 1mM and 30 µM  
102 respectively. 2x10<sup>4</sup> cells maintained in 10% FBS/ DMEM were seeded onto non-coat in RPMI-G or

103 fibronectin-coated in DA-X condition well of 4-well cell culture plate. At 1 day after seeded, M $\beta$ CD  
104 or soluble cholesterol was added (the solvent, sterile water or EtOH, was added for control  
105 respectively). For exploring of functions of cholesterol biosynthesis depending on culture medium,  
106 Ro48-8071 (Cayman, 10006415), a selective inhibitor of Oxidosqualen cyclase, known as Cholesterol  
107 biosynthesis inhibitor was used.  $2 \times 10^4$  cells maintained in 10% FBS/ DMEM were seeded onto non-  
108 coat in 10% FBS/ DMEM or fibronectin-coated in DA-X condition well of 4-well cell culture plate.  
109 At 1 day after seeded, Ro48-8071 was added at 1  $\mu$ M (the solvent, EtOH, was added for control).

110

#### 111 **Qualitative estimation of membrane cholesterol**

112 For labeling of membrane cholesterol, cells grown on 4-well plate were fixed with 4%  
113 paraformaldehyde in PBS for 15 min at room temperature. The cells were washed three times in PBS,  
114 and then incubate with 1.5 mg/ml glycine in PBS for 10 min at room temperature to quench the  
115 paraformaldehyde. Cells were stained with filipin working solution (0.05 mg/ml filipin III (Cayman,  
116 70440) in 10% FBS-contained PBS) for 2 hrs at room temperature, and washed three times in PBS,  
117 and then the images were collected by fluorescent microscopy in PBS (Keyence, BZ-X710).

118

#### 119 **RNA preparation and real-time PCR**

120 Total RNAs were extracted by using Sepasol-RNA I Super G (nacalai tesque, 09379) to the  
121 manufacturer's instructions. RNAs were reverse-transcribed using ReverTra Ace qPCR RT Master  
122 Mix (TOYOBO, FSQ-201), and real-time PCR was performed using THUNDERBIRD SYBR qPCR  
123 Mix (TOYOBO, QPS-201) in MIC qPCR (bio molecular systems). Expression levels of each gene  
124 were normalized to  $\beta$ -ACTIN (human) expression and calculated using comparative CT method. The  
125 primer sequences are shown in below:  $\beta$ -ACTIN-F (CTGGCACCACACCTTCTACAATG),  $\beta$ -  
126 ACTIN-R (AATGTCACGCACGATTTCCCGC), SREBF1-F (ACAGTGACTTCCCTGGCCTAT),  
127 SREBF1-R (GCATGGACGGGTACATCTTCAA), SREBF2-F (AACGGTCATTCACCCAGGTC),  
128 SREBF2-R (GGCTGAAGAATAGGAGTTGCC), ACSS2-F  
129 (AAAGGAGCAACTACCAACATCTG), ACSS2-R (GCTGAACTGACACACTTGGAC),  
130 HMGCR-F (TGATTGACCTTTCCAGAGCAAG), HMGCR-R  
131 (CTAAAATTGCCATTCCACGAGC), HM-GCS1-F (GATGTGGGAATTGTTGCCCTT),  
132 HMGCS1-R (ATTGTCTCTGTTCCAACCTCCAG), LDLR-F (ACCAACGAATGCTTGGACAAC),  
133 LDLR-R (ACAGGCACTCGTAGCCGAT), ACLY-F (TCGGCCAAGGCAATTCAGAG), ACLY-  
134 R (CGAGCATACTTGAACCGATTCT).

135

136 **Statistical analysis**



137 Statistical analysis was performed using the Student's t-test. P values < 0.05 were considered to be  
138 statistically significant.

139

## 140 **Results:**

### 141 | **Development of a novel serum-free culture condition for HeLa cells**

142 ITS-G/ RPMI1640 (referred to as "RPMI-G" hereafter), a defined serum-free cell culture medium  
143 reported previously(11), contains ITS-G supplement composed of Insulin-Transferrin-Selenium,  
144 known to support cell proliferation in reduced-serum medium. RPMI-G supported robust cell adhesion  
145 and proliferation of several melanoma cell lines. We tested culturing HeLa cells in RPMI-G medium.  
146 Interestingly, however, HeLa cells loosely attached to the culture plate 2~3 days after seeding, and  
147 consequently could not be maintained in RPMI-G medium (Fig. 1a). To establish a simpler and more  
148 reliable serum-free condition that can facilitate the functional analysis of cholesterol and lipid  
149 metabolism of a number of adherent cancer cell lines including HeLa cells, we optimized the RPMI-  
150 G medium taking consideration of several culture parameters: (1) Cell adhesion to culture plates, (2)  
151 Cell morphology (with or without pseudopodia), and (3) Cell proliferation. We didn't consider the  
152 long-term cultivability. After testing the effects of various supplements, base media and extracellular  
153 matrix in serum-free conditions, We found ethanolamine in ITS-X, fibronectin-precoating and DMEM

154 base medium had positive effects on cell adhesion and extension of pseudopodia, and the  
155 supplementation of BSA improved cell proliferation (Fig. 1a). Interestingly, we found although  
156 DMEM/Ham's F-12 is widely used as a basal media for serum-free cultures(1), cell attachment was  
157 markedly attenuated with the retraction of pseudopodia on day 5 while initial cell attachment and  
158 growth were not affected (Fig. 1b). We also tested the effects of several extracellular matrix proteins,  
159 which are widely used in pluripotent stem cells including human iPS cells (Fig. 1c)(1,2). Taken  
160 together, ITS-X/ DMEM/ BSA on fibronectin pre-coated culture plates, referred to as the "DA-X  
161 condition", was determined to be the optimal serum-free culture condition that supports stable  
162 adhesion, extended pseudopodia and robust cell proliferation, which is comparable to 10% FBS/  
163 DMEM medium condition (Fig. 1).

## 164

### 165 | **The utility of DA-X condition for studying cholesterol function**

166 It is difficult to see the early effects of cholesterol biosynthesis inhibition or depletion of membrane  
167 cholesterol (e.g. treatment with Methyl- $\beta$ -cyclodextrin) in adherent cultures, since serum even at  
168 reduced levels contains large amounts of lipids and cholesterols. In fact, Ro48-8071, a selective  
169 inhibitor of Oxidosqualen cyclase, had no effects on adherent HeLa cells cultured in 10% FBS/ DMEM  
170 medium (Fig. 2a, two images at top). In sharp contrast, addition of Ro48-8071 in DA-X condition had

171 a dramatic effect, and almost all cells detached and underwent apoptosis within 48 hours (Fig. 2a, two  
172 images at bottom). These results demonstrate the potential of the serum-free DA-X condition to  
173 provide an appropriate culture environment for analyzing the role of lipids and cholesterol in adherent  
174 cancer cell lines.

175

### 176 | **DA-X condition as universal serum-free condition for cancer cell lines**

177 The development of serum-free media that can be broadly applied to any cancer cell line is important  
178 for studying the role of lipids and cholesterol in the survival and proliferation of cancer cells. Next,  
179 we performed side-by-side comparison of RPMI-G medium and DA-X condition in terms of cell  
180 adhesion, pseudopodia and proliferation using representative human cancer cell lines derived from  
181 different organs and tissues (Fig. 2b and 2c). Cancer cells maintained in 10% FBS/ DMEM medium  
182 were switched to culture in serum-free conditions RPMI-G and DA-X, and phase contrast images were  
183 recorded on day 5 to monitor cell viability, attachment, morphology, and proliferation. In general, we  
184 found DA-X condition was more reliable than RPMI-G to support cell survival and proliferation with  
185 pronounced elongated pseudopodia in tested cell lines (Fig. 2b and 2c). Cell proliferation and  
186 attachment of SH-SY5Y (neuroblastoma) and PC-3 (prostatic cancer) in DA-X condition was  
187 comparable to those in RPMI-G. Although HepG2 (hepatoma) and SW620 (colon cancer) in DA-X

188 condition showed comparable proliferation when compared to that in RPMI-G, they exhibited more  
189 evident adhesion and pseudopodia in cells than those in RPMI-G. In the other lines including A549  
190 (lung cancer), Panc-1 (pancreatic cancer), HeLa (cervical cancer), MCF-7 (breast cancer), cell survival  
191 and proliferation were observed only under DA-X condition but not in RPMI-G. Taken together, we  
192 demonstrate the efficacy in culturing (at least for 5 days without passaging) a number of adherent  
193 cancer cell lines in the serum-free DA-X condition, which holds great potential for analyzing role of  
194 lipids and cholesterol in these cells (Fig. 2).

195

#### 196 | **Varied cholesterol content in serum-free culture medium condition**

197 RPMI-G, a defined serum free cell culture medium, supports de novo fatty acid and -cholesterol  
198 biosynthesis in several adherent melanoma cell lines, which enabled unperturbed cell adhesion and  
199 proliferation (11). While testing the hypothesis that cells grown in the DA-X condition have increased  
200 fatty acid and cholesterol production through upregulation of biosynthesis-related genes when  
201 compared to the RPMI-G culture medium, we surprisingly found that the amount of cholesterol in the  
202 membrane of HeLa cells in DA-X medium was greatly reduced in comparison to that in RPMI-G (Fig.  
203 3a). Consistently, significant transcriptional down-regulation of cholesterol biosynthesis-related genes  
204 was also observed in cells cultured in the DA-X condition. In contrast, these genes were up-regulated

205 in RPMI-G when compared with 10% FBS/ DMEM as previously reported (Fig. 3b)(11). Together,  
206 these results lead us to hypothesize that cells grown in RPMI-G medium are prone to detach due to the  
207 excess of membrane cholesterol, DA-X condition provides benefit for stable cell adhesion in part due  
208 to lowered membrane cholesterol content.

209

### 210 | **Range of optimal membrane cholesterol for stable cell adhesion**

211 To determine whether there is an appropriate range of membrane cholesterol for stable cell adhesion  
212 in serum-free medium condition, we modulate the membrane cholesterol levels in both RPMI-G and  
213 DA-X conditions to see their effects on cell adhesion. Augmentation and depletion of membrane  
214 cholesterol were achieved by supplementation with soluble cholesterol and Methyl- $\beta$ -cyclodextrin  
215 (referred to as “M $\beta$ CD” below), respectively (Fig. 3c, d). Depletion of cellular membrane cholesterol  
216 by M $\beta$ CD in RPMI-G (Fig. 3a, b) resulted in a significant improvement in cell adhesion (Fig. 3c). In  
217 contrast, under DA-X conditions, both increase and depletion of membrane cholesterol led to the  
218 attenuation of cell adhesion accompanied by the retraction of elongated pseudopodia (Fig. 3d). These  
219 results suggest that the excess of membrane cholesterol in RPMI 1640 medium may have caused cell  
220 death due to compromised cell adhesion, and the beneficial effects of the DA-X condition may due to  
221 the appropriate amount of membrane cholesterol achieved by the suppression of cholesterol

222 biosynthesis-related gene expression (Fig. 3)(12).

223

### 224 | **Involvement of fibronectin in the suppressing genes needed for cholesterol biosynthesis**

225 To determine the molecular mechanisms by which expression of cholesterol biosynthesis-related  
226 genes were suppressed in DA-X condition, we inhibited fibronectin-binding and -mediated signaling  
227 by the addition of RGDS peptide(2,13,14), and quantified the expression levels of cholesterol  
228 biosynthesis-related genes by quantitative PCR analysis (Fig. 4a, b). Inhibition of fibronectin with  
229 RGDS peptide in DA-X condition resulted in not only different cell morphology (Fig. 4a) but also  
230 significant up-regulation of cholesterol biosynthesis-related genes (Fig. 4b). Therefore, fibronectin-  
231 binding or -mediated signaling play important roles in the suppression of cholesterol production in  
232 DA-X condition.

233

### 234 **Discussion:**

235 Here, we show that the amount of cholesterol in the cell membrane greatly affects cell attachment  
236 and pseudopodia formation, and eventually the survival of cells under serum-free conditions.  
237 Furthermore, functional analysis by modulating membrane cholesterol content in RPMI-G and DA-X  
238 conditions revealed that there is the appropriate range of membrane cholesterol for stable cell

239 attachment, pseudopodia formation, and proliferation in serum-free medium condition (Fig. 3c, d and  
240 4c). We demonstrated that cells grown in the DA-X culture condition maintained the right amount of  
241 cholesterol in cell membrane in part through extracellular matrix (fibronectin) signaling. The positive  
242 results seen using eight representative human cancer cell lines suggest that the DA-X condition serves  
243 as a universal serum-free culture condition that support pseudopodia formation, robust cell attachment  
244 and proliferation prior to cell passaging. This contrasts with conventional serum-free media, which are  
245 typically developed and optimized for each cell types. We therefore believe the DA-X culture  
246 condition can serve as a powerful platform for clarifying the role of cholesterol in different cancer  
247 cells(1).

248 We also demonstrated that supplementation of Ro48-8071 in DA-X condition had profound effects  
249 on cell detachment and viability (Fig. 2a). Statin, inhibitors of HMG-CoA reductase, has also shown  
250 to inhibit cancer cell proliferation and increase apoptosis(8,15,16), which seems dependent on cell  
251 attachment since similar effects were not observed in acute lymphoid leukemia grown in suspension  
252 (7). Future studies are warranted to further examine the mechanism(s) of cell death by cholesterol  
253 biosynthesis inhibition on cancer cells.

254 We observed that marked increase of membrane cholesterol content in RPMI-G cultured HeLa  
255 cells (Fig. 3a, b), which is consistent with what was seen in other type of serum-free conditions (17).

256 Cells in these conditions are prone to detachment and cell apoptosis. Enrichment of cholesterol in the  
257 lipid raft of membrane in cancer cells make them more sensitive to cholesterol depletion and induces  
258 anoikis like cell death(18), suggesting that there is a close relationship between the amount of  
259 membrane cholesterol in cancer cells and cell survival in serum-free culture condition.

260 Finally, from the perspective of decarbonization, recently research on cultured meat is rapidly  
261 progressing but most, if not all, cultures still use serum-supplemented medium. Serum-free medium  
262 will be essential for the establishment of cultured meat in the future in order to reduce cost, achieve  
263 consistency and minimize the impact of carbonization(19). Our study revealed that keeping the right  
264 amount of membrane cholesterol is essential for cell survival and proliferation in serum-free culture  
265 conditions, and we believe these results will facilitate the development of serum-free medium for  
266 cultured meat.

267

268 **Acknowledgment:**

269 This work was partly supported by grants from JSPS KAKENHI Grant Number JP20K06661 (Grant-  
270 in-Aid for Scientific Research (C)), Kindai University Research Enhancement Grant (21st Century  
271 Joint Research Enhancement Grant), the Cooperative Research Project Program of Joint  
272 Usage/Research Center at the Institute of Development, Aging and Cancer, Tohoku University.



273

274 **References:**

- 275 1. Yao T, Asayama Y. Animal-cell culture media: History, characteristics, and current issues.  
276 *Reproductive Medicine and Biology*. 2017;16(2):99–117.
- 277 2. van der Valk J, Brunner D, De Smet K, Fex Svenningsen Å, Honegger P, Knudsen LE, et al.  
278 Optimization of chemically defined cell culture media - Replacing fetal bovine serum in  
279 mammalian in vitro methods. *Toxicology in Vitro* [Internet]. 2010;24(4):1053–63.
- 280 3. Butler M. Serum-free media: standardizing cell culture system. *Pharmaceutical Bioprocessing*.  
281 2013;1(4):315–8.
- 282 4. Fernández C, Lobo MDVT, Gómez-Coronado D, Lasunción MA. Cholesterol is essential for  
283 mitosis progression and its deficiency induces polyploid cell formation. *Experimental Cell*  
284 *Research*. 2004;300(1):109–20.
- 285 5. Llaverias G, Danilo C, Mercier I, Daumer K, Capozza F, Williams TM, et al. Role of  
286 cholesterol in the development and progression of breast cancer. *American Journal of*  
287 *Pathology* [Internet]. 2011;178(1):402–12.
- 288 6. Yue S, Li J, Lee SY, Lee HJ, Shao T, Song B, et al. Cholesteryl ester accumulation induced  
289 by PTEN loss and PI3K/AKT activation underlies human prostate cancer aggressiveness. *Cell*

- 290 Metabolism [Internet]. 2014;19(3):393–406.
- 291 7. Dimitroulakos J, Nohynek D, Backway KL, Medley DW, Yeger H, Freedman MH, et al.  
292 Increased sensitivity of acute myeloid leukemias to lovastatin-induced apoptosis: A potential  
293 therapeutic approach. *Blood* [Internet]. 1999;93(4):1308–18.
- 294 8. Demierre MF, Higgins PDR, Gruber SB, Hawk E, Lippman SM. Statins and cancer  
295 prevention. *Nature Reviews Cancer*. 2005;5(12):930–42.
- 296 9. Beloribi-Djefafli S, Vasseur S, Guillaumond F. Lipid metabolic reprogramming in cancer  
297 cells. *Oncogenesis*. 2016;5(1):e189–e189.
- 298 10. Nakagawa M, Taniguchi Y, Senda S, Takizawa N, Ichisaka T, Asano K, et al. A novel  
299 efficient feeder-free culture system for the derivation of human induced pluripotent stem  
300 cells. *Scientific Reports*. 2014;4:1–7.
- 301 11. Wu S, Näär AM. A lipid-free and insulin-supplemented medium supports De Novo fatty acid  
302 synthesis gene activation in melanoma cells. *PLoS ONE*. 2019;14(4):1–21.
- 303 12. Lietha D, Izard T. Roles of membrane domains in integrin-mediated cell adhesion.  
304 *International Journal of Molecular Sciences*. 2020;21(15):1–19.
- 305 13. Page K, Lange Y. Cell adhesion to fibronectin regulates membrane lipid biosynthesis through  
306 5'-AMP-activated protein kinase. *Journal of Biological Chemistry*. 1997;272(31):19339–42.

- 307 14. Grigoriou V, Shapiro IM, Cavalcanti-Adam EA, Composto RJ, Ducheyne P, Adams CS.  
308 Apoptosis and survival of osteoblast-like cells are regulated by surface attachment. *Journal of*  
309 *Biological Chemistry*. 2005;280(3):1733–9.
- 310 15. Hoque A, Chen H, Xu XC. Statin induces apoptosis and cell growth arrest in prostate cancer  
311 cells. *Cancer Epidemiology Biomarkers and Prevention*. 2008;17(1):88–94.
- 312 16. Sánchez CA, Rodríguez E, Varela E, Zapata E, Páez A, Massó FA, et al. Statin-induced  
313 inhibition of MCF-7 breast cancer cell proliferation is related to cell cycle arrest and apoptotic  
314 and necrotic cell death mediated by an enhanced oxidative stress. *Cancer Investigation*.  
315 2008;26(7):698–707.
- 316 17. Mishra S, Peterson K, Yin L, Berger A, Fan J, Wistow G. Accumulation of cholesterol and  
317 increased demand for zinc in serum-deprived RPE cells. *Molecular Vision*.  
318 2016;22(July):1387–404.
- 319 18. Park E-K, Park MJ, Lee S-H, Li YC, Kim J, Lee J-S, et al. Cholesterol depletion induces  
320 anoikis-like apoptosis via FAK down-regulation and caveolae internalization. *Journal of*  
321 *Pathology*. 2009;218(January):337–49.
- 322 19. O’Neill EN, Cosenza ZA, Baar K, Block DE. Considerations for the development of cost-  
323 effective cell culture media for cultivated meat production. *Comprehensive Reviews in Food*

324 Science and Food Safety. 2021;20(1):686–709.

325

326 **Figure captions**

327 **Figure 1 | Optimization of novel serum-free condition on HeLa cells. a,** Representative images of  
328 cells in each culture condition. In screening for novel serum-free condition,  $2 \times 10^4$  cells of HeLa cell  
329 (human cervical cancer cell line) maintained in 10% FBS/ DMEM were seeded onto each serum-free  
330 media condition. Combinations of media composition and extra-cellular matrix are shown. Improving  
331 stepwisely from RPMI-G with replacing the media composition resulted in establishment of the ITS-  
332 X/ DMEM/ BSA on fibronectin-precoated well (called as DA-X condition), which significantly  
333 improved cell adhesion, pseudopodia elongation, or proliferation. Non-coat, without any pre-coating.  
334 White and pink arrowheads indicate cells with losing attachment and cells with firm elongated  
335 pseudopodia, respectively. FN, fibronectin-coated. Scale bar, 100  $\mu\text{m}$ . **b,** Representative images of  
336 cells cultured in DMEM/ Ham's F-12-based medium with ITS-X/ BSA on fibronectin-precoated well.  
337 **c,** Representative images of cells in comparison of effect of extracellular matrix.  $2 \times 10^4$  cells of HeLa  
338 cell maintained in 10% FBS/ DMEM were seeded onto a pre-coated well with each extracellular matrix.  
339 Regarding to cell adhesion, pseudopodia elongation, or proliferation, fibronectin was shown as much  
340 better than the other extracellular matrix. The effect of vitronectin was shown as comparable to that of

341 fibronectin in cell adhesion and cell proliferation, but not in pseudopodia elongation. Scale bar, 100  
342  $\mu\text{m}$ .

343

344 **Figure 2 | Availability of DA-X condition on analysis for cholesterol function, and in several**

345 **cancer lines. a,** Effect of cholesterol biosynthesis inhibitor, Ro48-8071, on HeLa cells in serum-

346 containing and -free culture condition for 48 hrs. In cells grown in 10% FBS/ DMEM, Ro48-8071

347 was shown to have no effect on cell survival and even their proliferation, while almost cells cultured

348 in DA-X condition were shown to be dead. Scale bar, 100  $\mu\text{m}$ . **b and c,** Comparison of the effects of

349 RPMI-G medium and DA-X condition on cell adhesion, pseudopodia and proliferation in

350 representative human cancer cell lines of each organ and tissue. Images of cells cultured in RPMI-G

351 (b) and DA-X condition (c) at day 5 are shown. The number of cells at the start of culture was

352 optimized for each cell type to reach about 80% confluency at day 5 in 10% FBS/ DMEM medium

353 (the using cancer cell lines and their number of cells at the start of cultures in one well of a 4-well

354 plate are shown below). HepG2 (hepatoma,  $4 \times 10^4$ ), A549 (lung cancer,  $2 \times 10^4$ ), Panc-1 (pancreatic

355 cancer,  $4 \times 10^4$ ), HeLa (cervical cancer,  $2 \times 10^4$ ), SH-SY5Y (neuroblastoma,  $4 \times 10^4$ ), SW620 (colon

356 cancer,  $4 \times 10^4$ ), PC-3 (prostatic cancer,  $3 \times 10^4$ ), MCF-7 (breast cancer,  $3 \times 10^4$ ). Scale bar, 100  $\mu\text{m}$ .

357

358 **Figure 3 | Required cholesterol level on membrane optimized by DA-X condition in HeLa cells.**

359 **a**, Cholesterol labeling with filipin fluorescence staining in each culture condition. Cells were cultured  
360 in 10% FBS/ DMEM, RPMI-G, DA-X condition for 2 days, and then applied for the staining. Signals  
361 of fluorescence were enriched in membrane of cells regardless of culture condition, and the intensity  
362 was strong in 10% FBS/ DMEM and RPMI-G, but quite faint in DA-X condition. Images for filipin  
363 staining were obtained using the same exposure time. Scale bar, 50  $\mu\text{m}$ . **b**, Quantitative PCR analysis  
364 of expression of de novo cholesterol biosynthesis-related genes. Cells cultured in each condition for 2  
365 days, and collected for further gene expression analysis. Error bars indicate s.d. (n=3, biological  
366 replicates). t-test, \*\*p < 0.01 and \*p < 0.05. **c**, Enhancement of cell adhesion and proliferation by  
367 depletion of membrane cholesterol with Methyl- $\beta$ -cyclodextrin (M $\beta$ CD) in RPMI-G culture medium.  
368 Pink arrowheads indicate cells with firm elongated pseudopodia. **d**, Effects of excess and depletion of  
369 membrane cholesterol on cell adhesion by addition of soluble cholesterol and M $\beta$ CD in DA-X  
370 condition. At day 4 and 5, attenuated cell adhesion with the retraction of pseudopodia was widely  
371 observed not only in addition of cholesterol, but also in depletion of membrane cholesterol with M $\beta$ CD.  
372 Scale bar, 100  $\mu\text{m}$ . White arrowheads indicate cells with losing attachment.

373

374 **Figure 4 | Involving fibronectin in down-regulation of cholesterol biosynthesis-related genes**

375 **expression in DA-X condition. a**, Representative images of HeLa cells under RGDS peptide  
376 treatment in DA-X culture condition. After exposed to RGDS peptide for 3 days, retracting the  
377 pseudopodia of cells was observed accompanied by tightly association between neighbor cells. Scale  
378 bar, 100  $\mu\text{m}$ . White arrowheads indicate cells with the retraction of pseudopodia. **b**, Quantitative PCR  
379 analysis of expression of de novo cholesterol biosynthesis-related genes. HeLa cells exposed to RGDS  
380 peptide for 4 days under DA-X condition were collected for further gene expression analysis. Error  
381 bars indicate s.d. (n=3, biological replicates). t-test,  $**p < 0.01$  and  $*p < 0.05$ . **c**, Schematic  
382 representation summarizing the appropriate range of cholesterol contents on cell membrane in serum-  
383 free medium condition for cell adhesion and proliferation.

384

**a**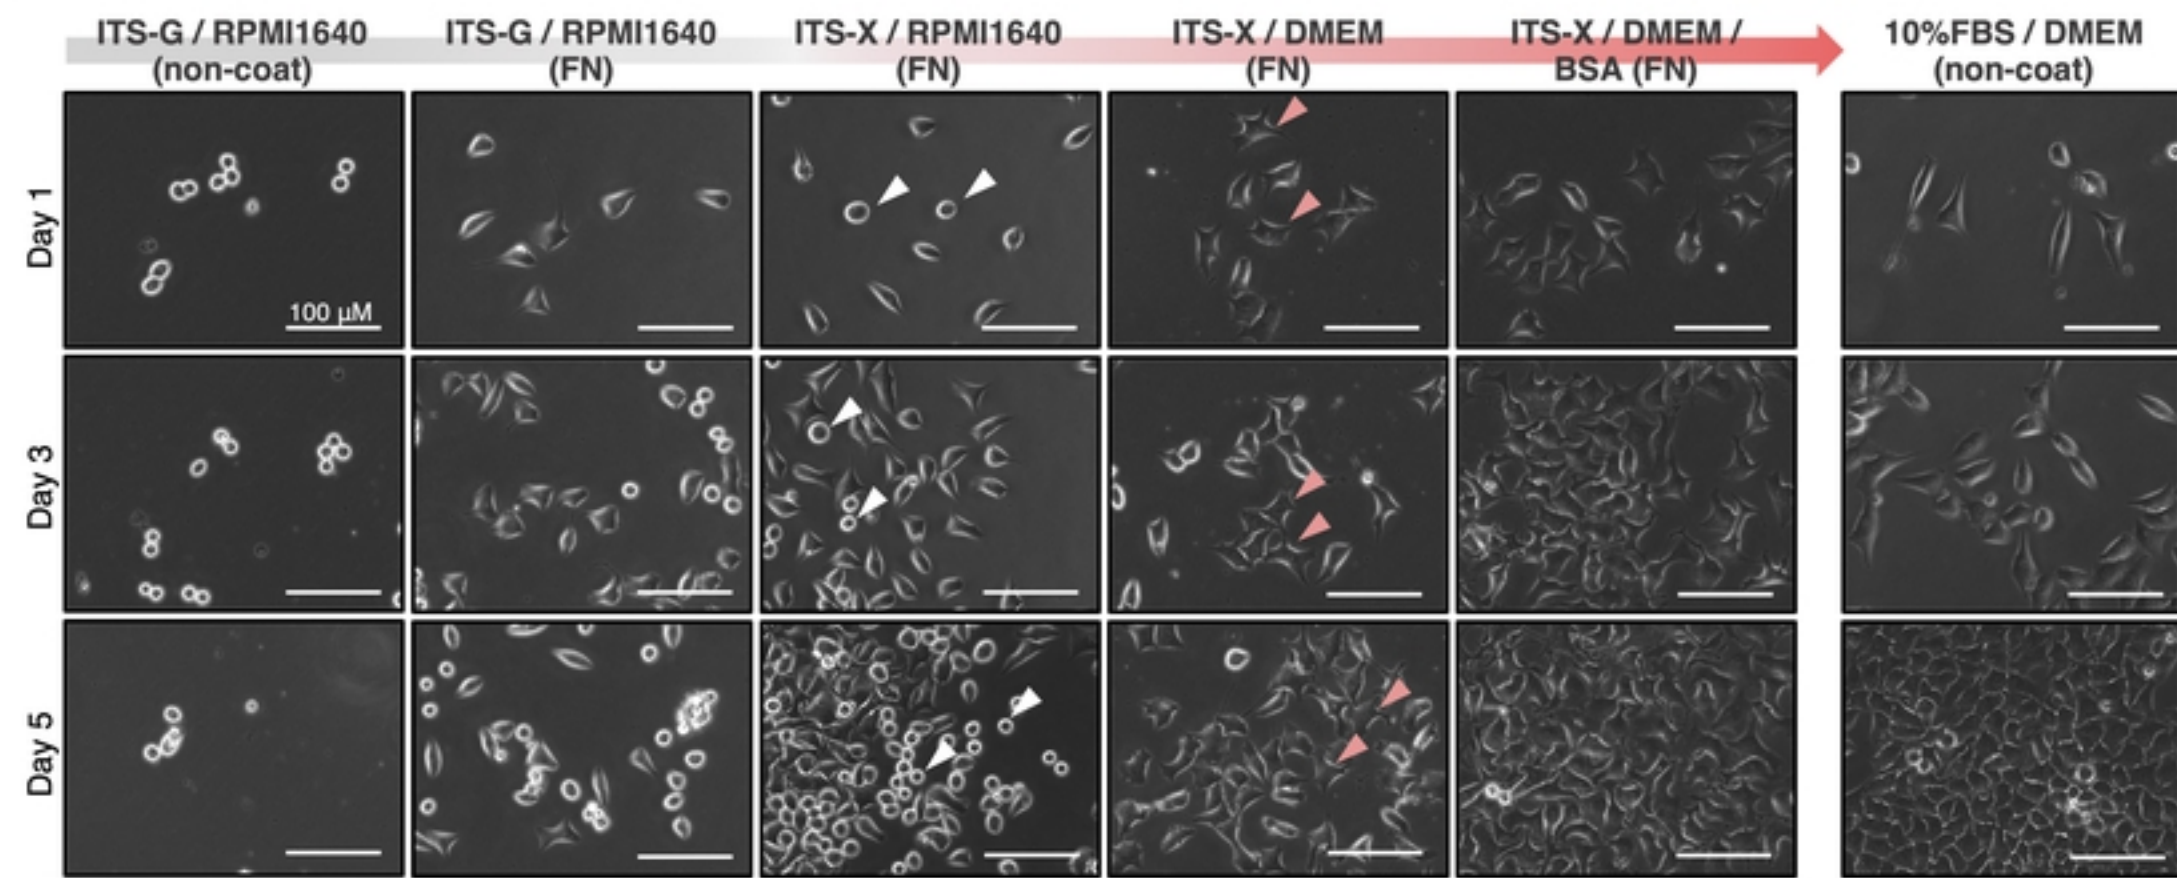

bioRxiv preprint doi: <https://doi.org/10.1101/2021.10.21.465296>; this version posted October 21, 2021. The copyright holder for this preprint (which was not certified by peer review) is the author/funder, who has granted bioRxiv a license to display the preprint in perpetuity. It is made available under aCC-BY 4.0 International license.

**b**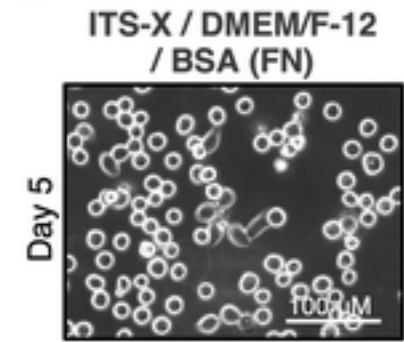**c**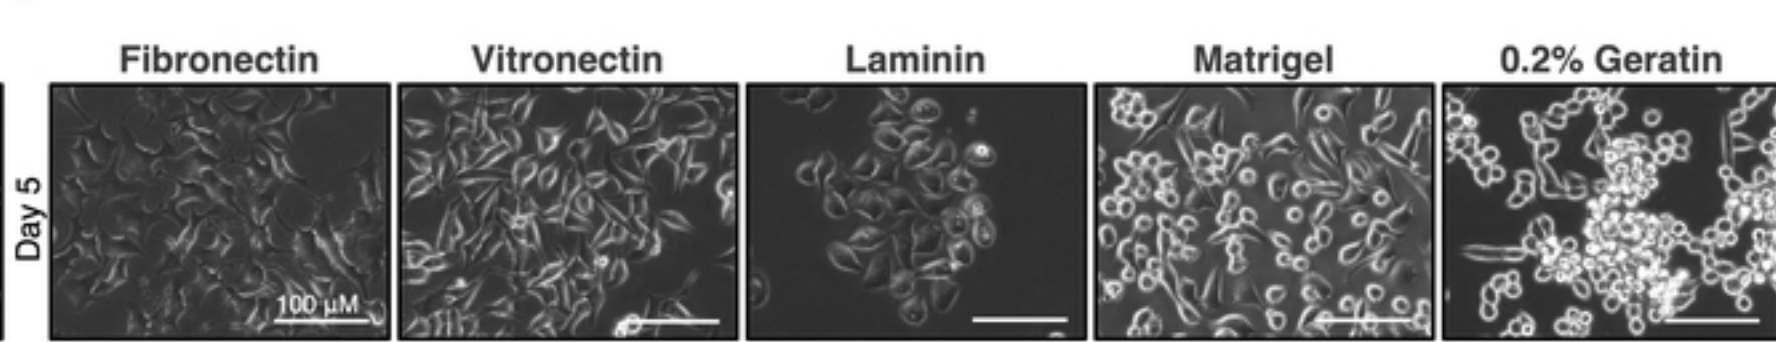



Figure 2

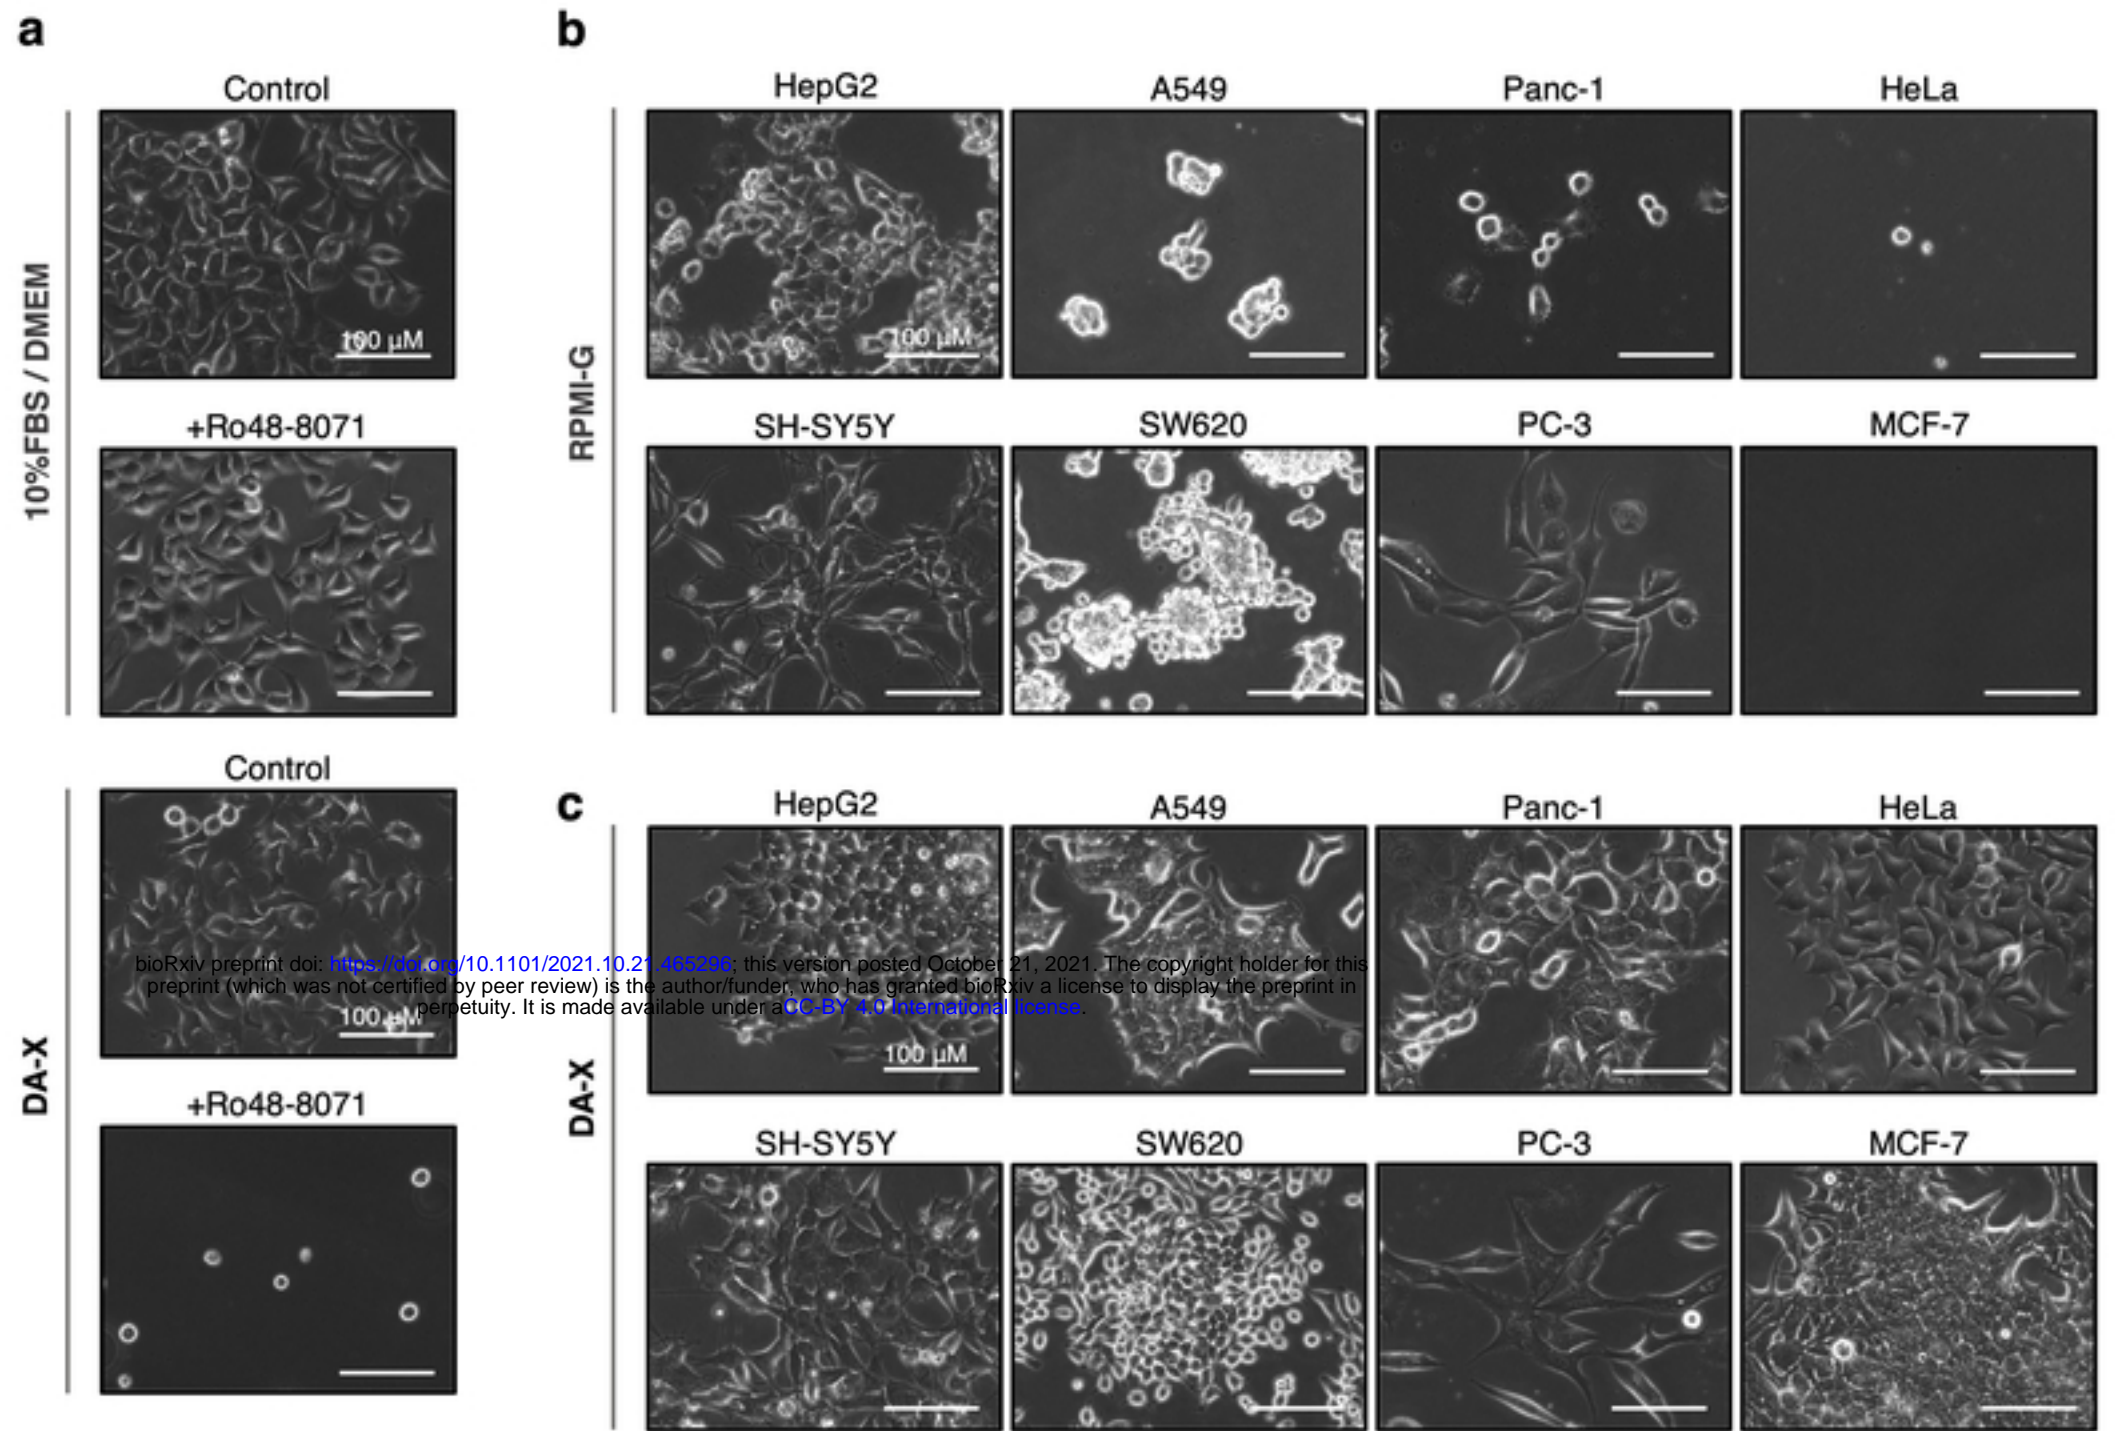

Figure 2

Figure 3

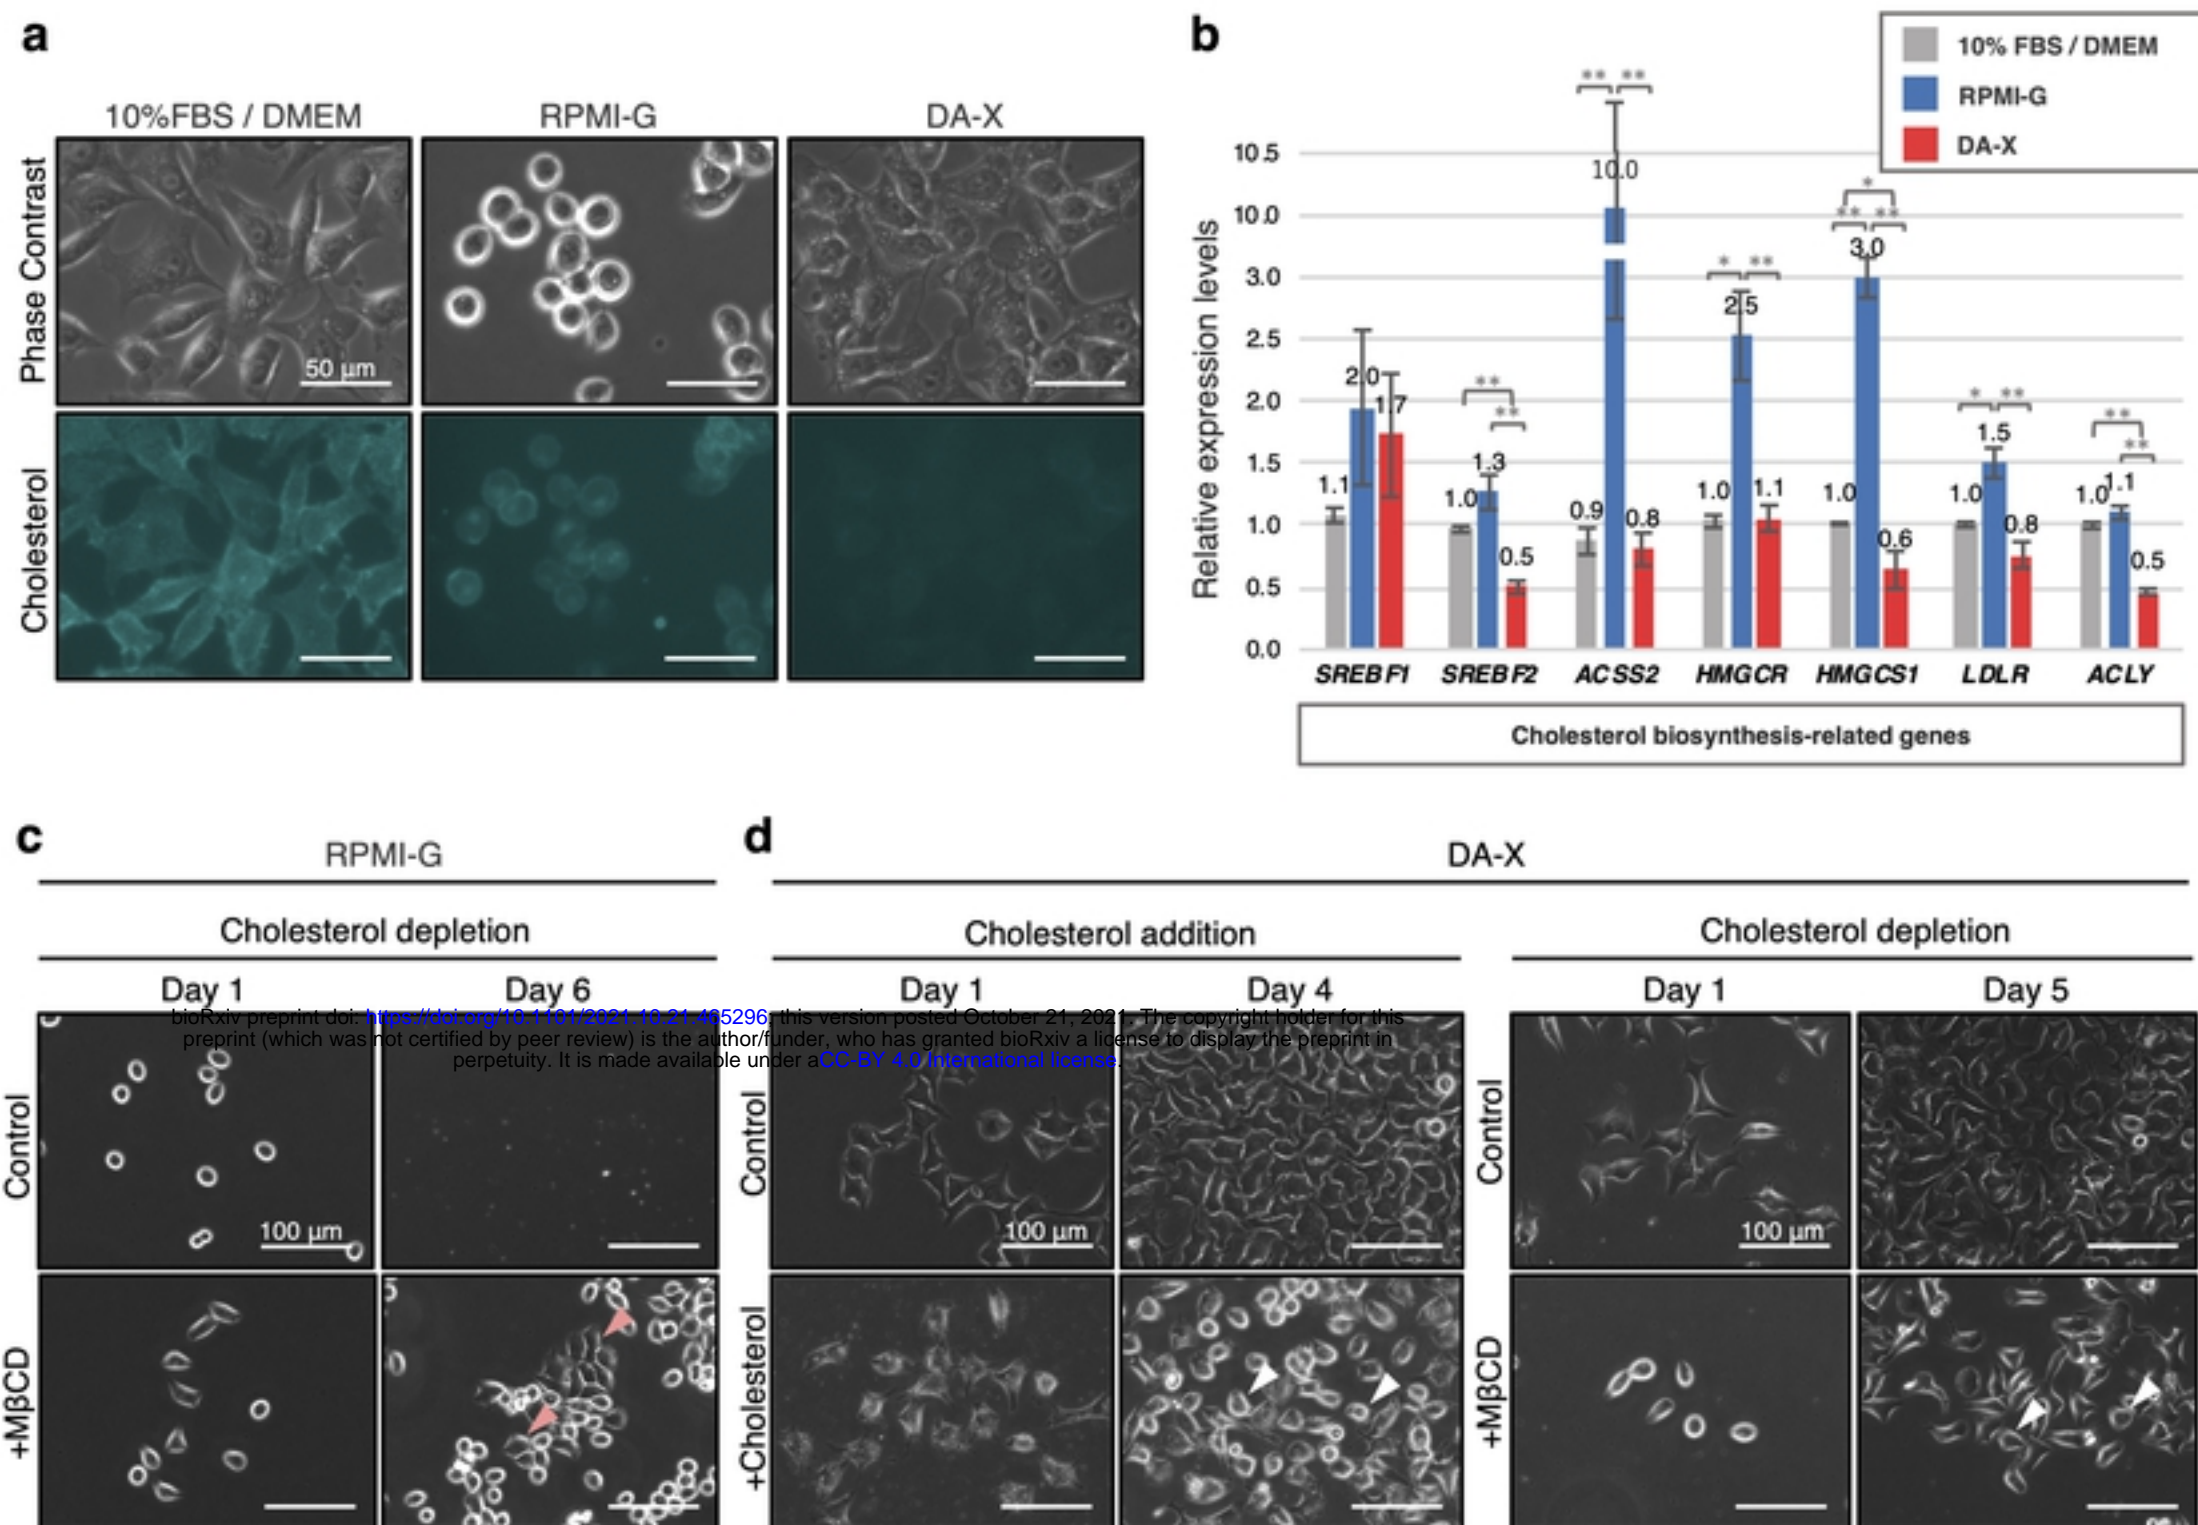

Figure 3

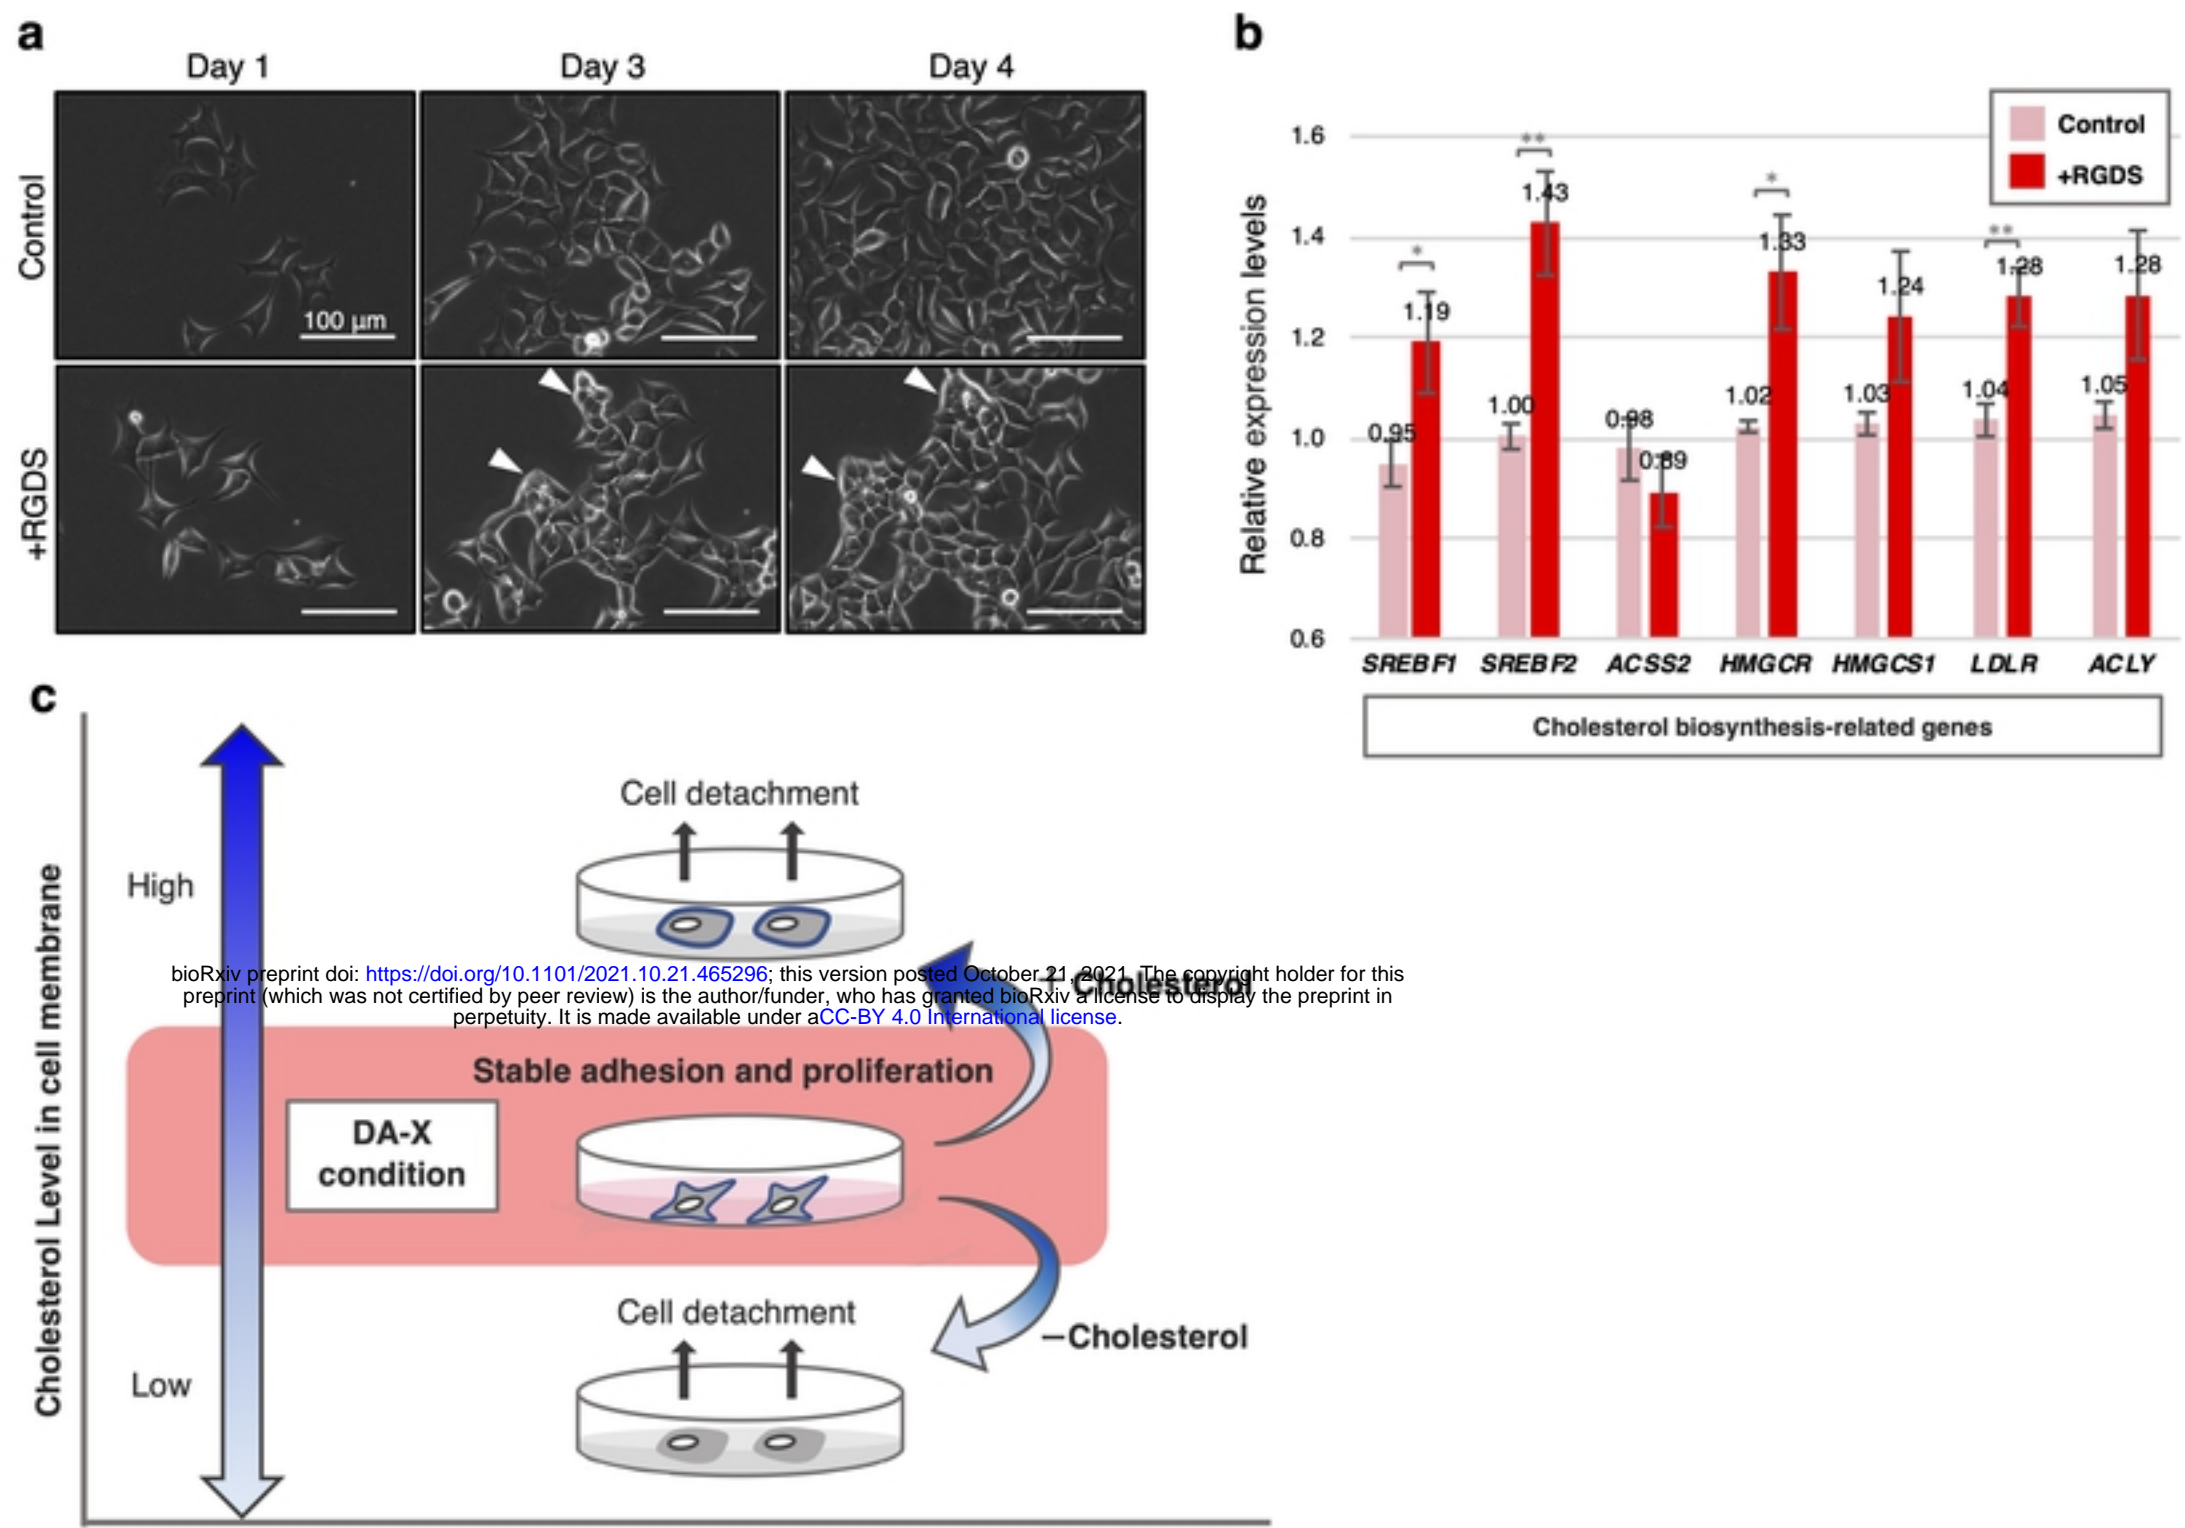

Source: http://biorxiv.org/content/10.1101/2021.10.21.465296v1.full.pdf
